# Supplementary material for: Tumor‐like features of gene expression and metabolic profiles in enlarged pancreatic islets are associated with impaired incretin‐induced insulin secretion in obese diabetes: A study of Zucker fatty diabetes mellitus rat
Source: PubMed Central journal article supplement — J Diabetes Investig. 2020 May 29;11(6):1434–47. doi: 10.1111/jdi.13272 (PMC7610108; doi:10.1111/jdi.13272), 2020-05-29
Supplement: JDI-11-1434-s001.pdf [file JDI-11-1434-s001.pdf]

**Supplementary Table 1: Pathway analysis of differentially expressed genes among islets of *fa/+* and *fa/fa* rats at 12 weeks of age**

| KEGG pathway                                   | <i>P</i> value         |
|------------------------------------------------|------------------------|
| rno04950:Maturity onset diabetes of the young  | $7.54 \times 10^{-10}$ |
| rno04911:Insulin secretion                     | $8.44 \times 10^{-10}$ |
| rno04930:Type II diabetes mellitus             | $1.90 \times 10^{-7}$  |
| rno05030:Cocaine addiction                     | $3.66 \times 10^{-6}$  |
| rno04974:Protein digestion and absorption      | $6.72 \times 10^{-5}$  |
| rno05031:Amphetamine addiction                 | $7.71 \times 10^{-5}$  |
| rno04024:cAMP signaling pathway                | $5.64 \times 10^{-4}$  |
| rno04972:Pancreatic secretion                  | $5.74 \times 10^{-4}$  |
| rno04727:GABAergic synapse                     | $9.90 \times 10^{-4}$  |
| rno04728:Dopaminergic synapse                  | 0.002092               |
| rno00430:Taurine and hypotaurine metabolism    | 0.005962               |
| rno05033:Nicotine addiction                    | 0.013114               |
| rno04913:Ovarian steroidogenesis               | 0.014106               |
| rno00650:Butanoate metabolism                  | 0.016433               |
| rno04923:Regulation of lipolysis in adipocytes | 0.017926               |
| rno04713:Circadian entrainment                 | 0.021944               |
| rno04721:Synaptic vesicle cycle                | 0.022401               |
| rno04922:Glucagon signaling pathway            | 0.025815               |
| rno04720:Long-term potentiation                | 0.027575               |
| rno04925:Aldosterone synthesis and secretion   | 0.029625               |
| rno04723:Retrograde endocannabinoid signaling  | 0.030139               |
| rno00410:beta-Alanine metabolism               | 0.031544               |
| rno04142:Lysosome                              | 0.037108               |
| rno00010:Glycolysis / Gluconeogenesis          | 0.037845               |
| rno05014:Amyotrophic lateral sclerosis (ALS)   | 0.045215               |
| rno04725:Cholinergic synapse                   | 0.04603                |
| rno01130:Biosynthesis of antibiotics           | 0.048821               |

Pathway analysis of differentially expressed genes among islets of *fa/+* and *fa/fa* rats at 12 weeks of age (nominal  $P < 0.05$  and fold change  $> 1.5$ ) was performed by using the Functional Annotation Tool of the DAVID Bioinformatics Resources 6.8.

A

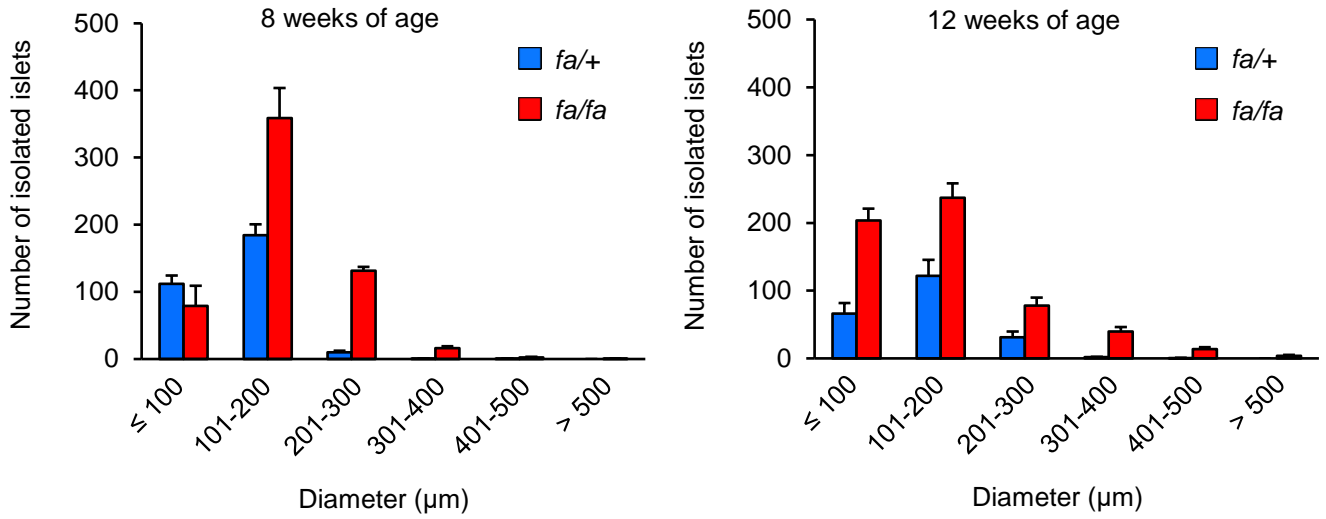

B

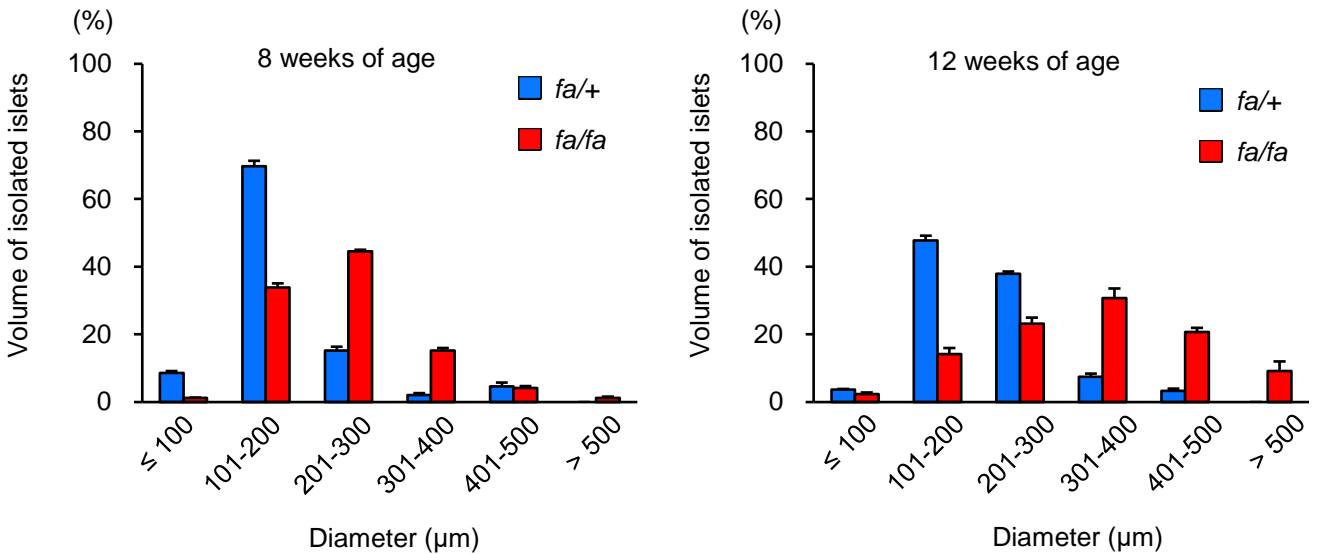

**Supplementary Figure 1: Size distribution of isolated islets of ZFDM rats**

A: The number of isolated islets of ZFDM rats was counted. Diameters of 200-700 islets of each rat were measured with microscopy (n = 8 for *fa/+* rats; n = 6 for *fa/fa* rats).

B: The volume of isolated islets of ZFDM rats was calculated using diameters of each islets. The data are expressed as means  $\pm$  SEM.

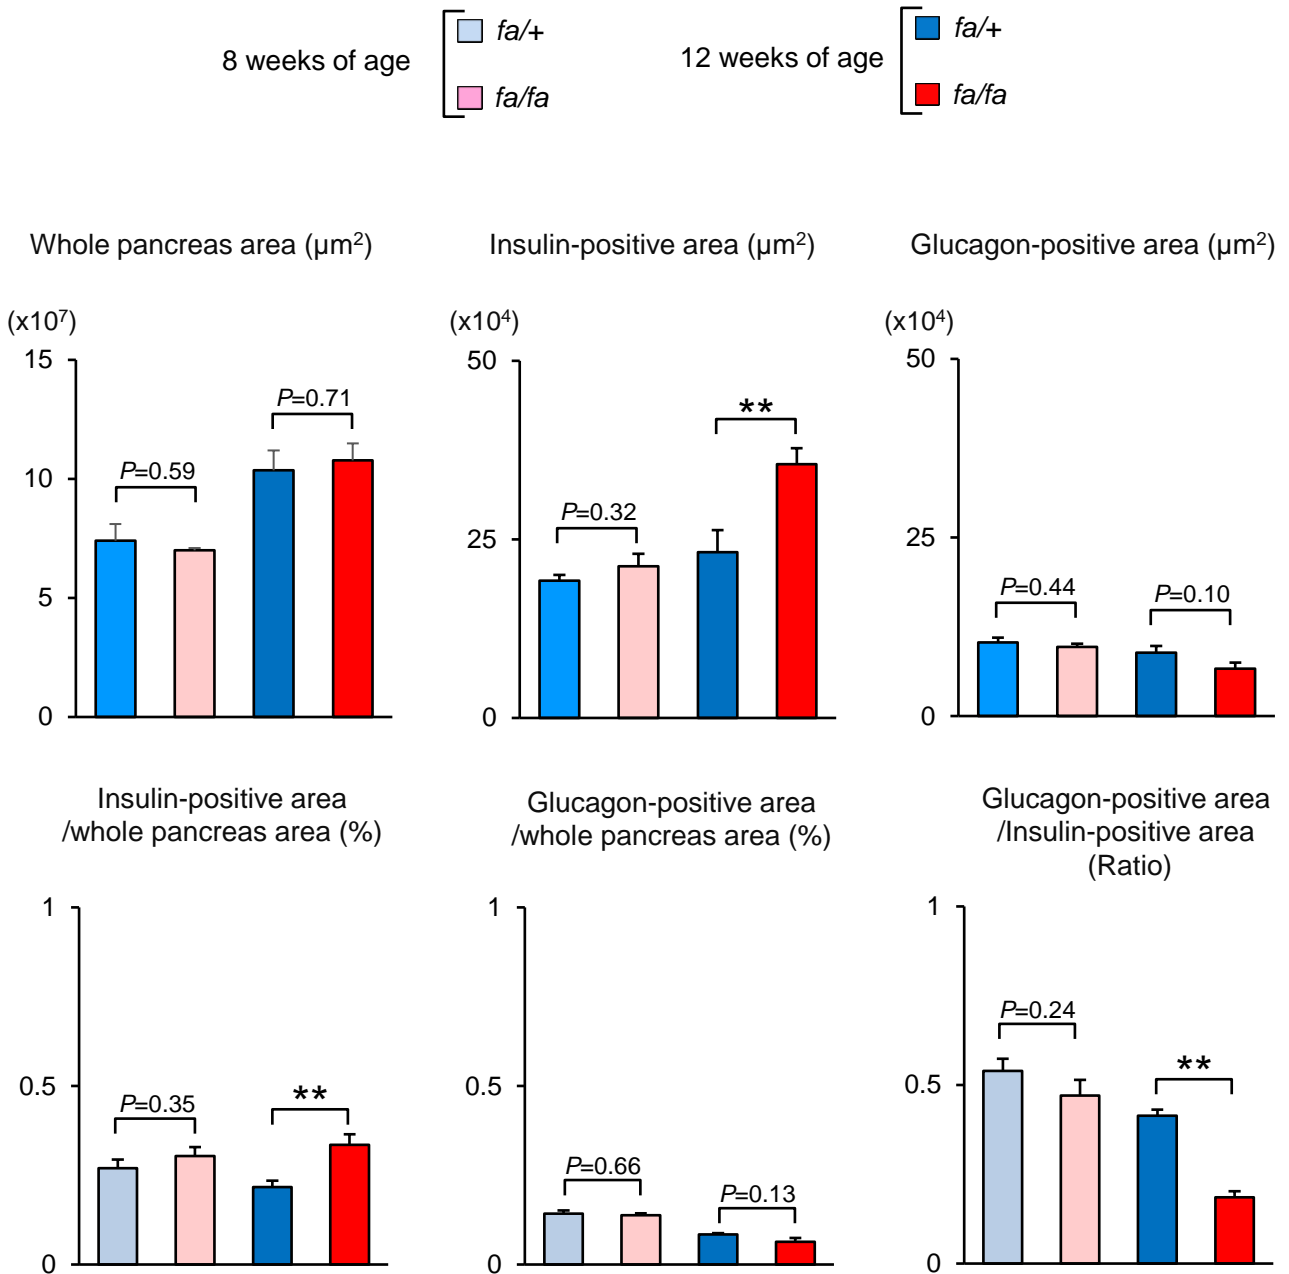

**Supplementary Figure 2: The area measurements of whole pancreas,  $\alpha$ - and  $\beta$ -cells in ZFDM rats**

The ratio of  $\alpha$ - or  $\beta$ -cell area in the whole pancreas was calculated by the formula “Total  $\alpha$ - or  $\beta$ -cell area divided by whole pancreas area” (6-9 pancreas sections of 3-4 rats for each genotype). The data are expressed as means  $\pm$  SEM. Holm’s method was used for evaluation of statistical significance. \*\* $P < 0.01$ .

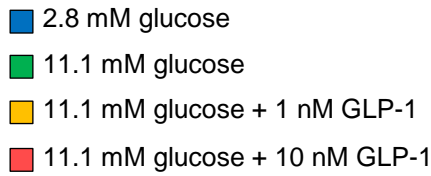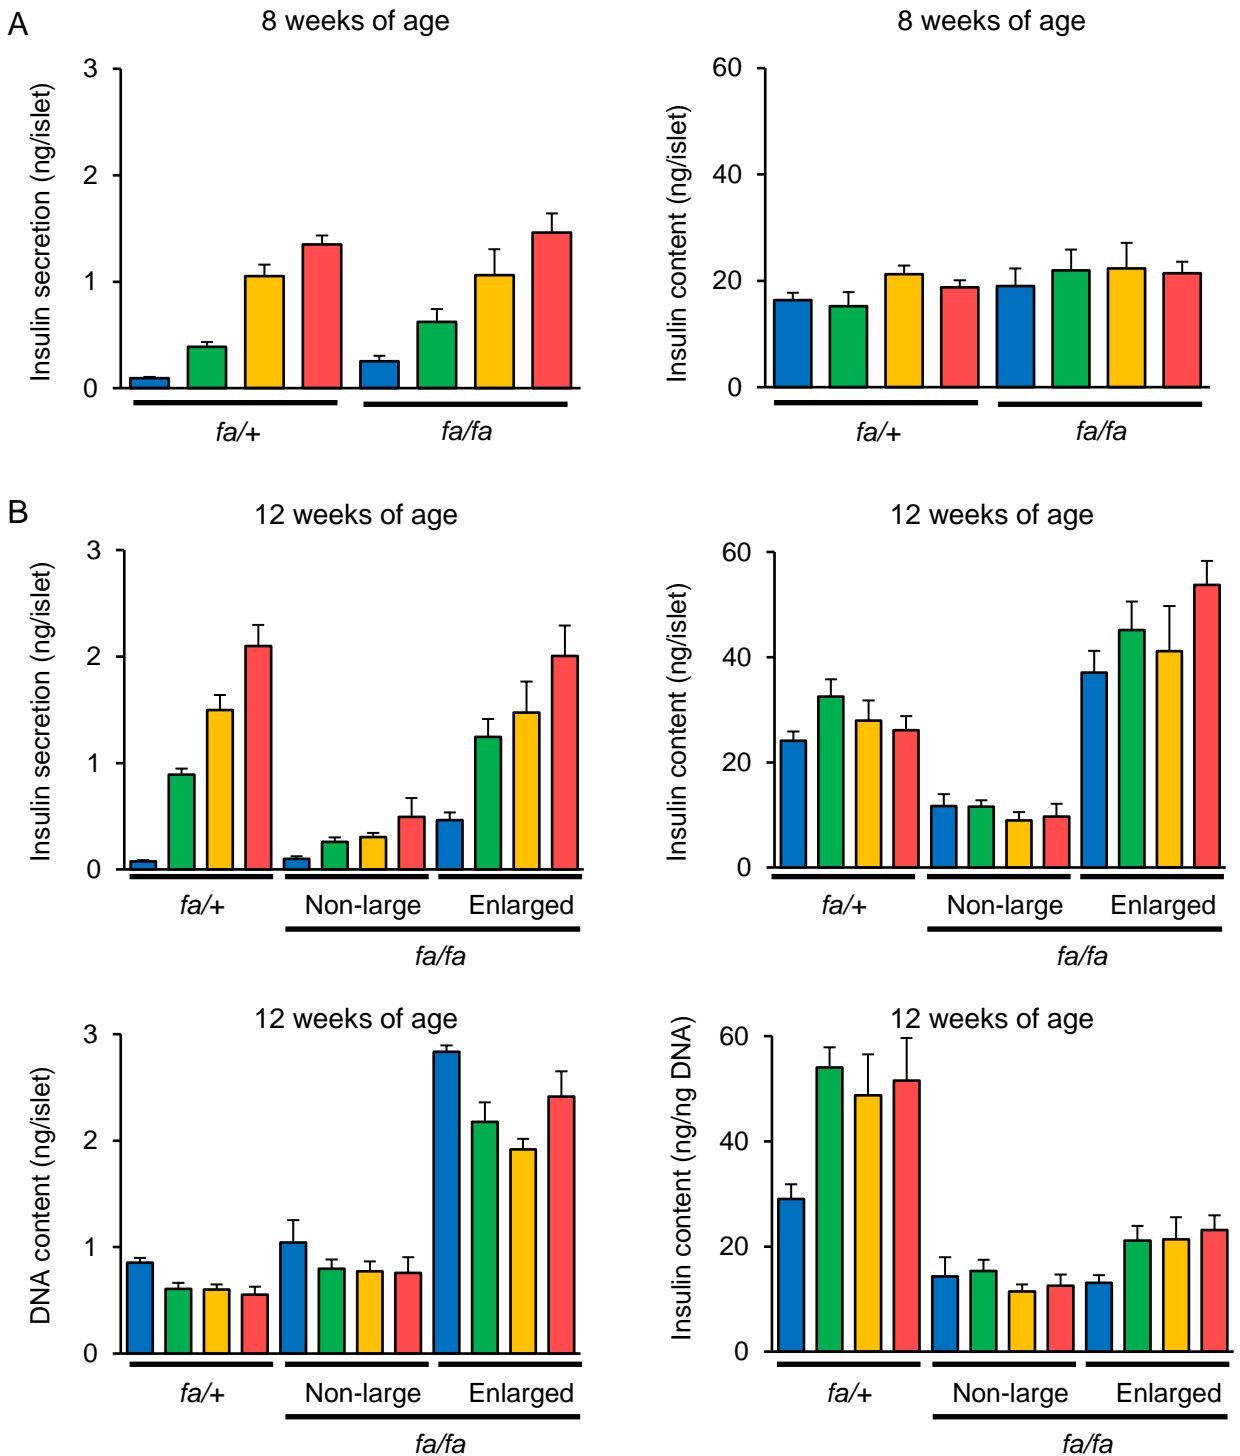

**Supplementary Figure 3: Released insulin, insulin content, and DNA content in the islets of ZFDM rats**

The islets were stimulated with glucose and GLP-1 at 8 (A) and 12 (B) weeks of age (n = 5-8). The data are expressed as means  $\pm$  SEM.

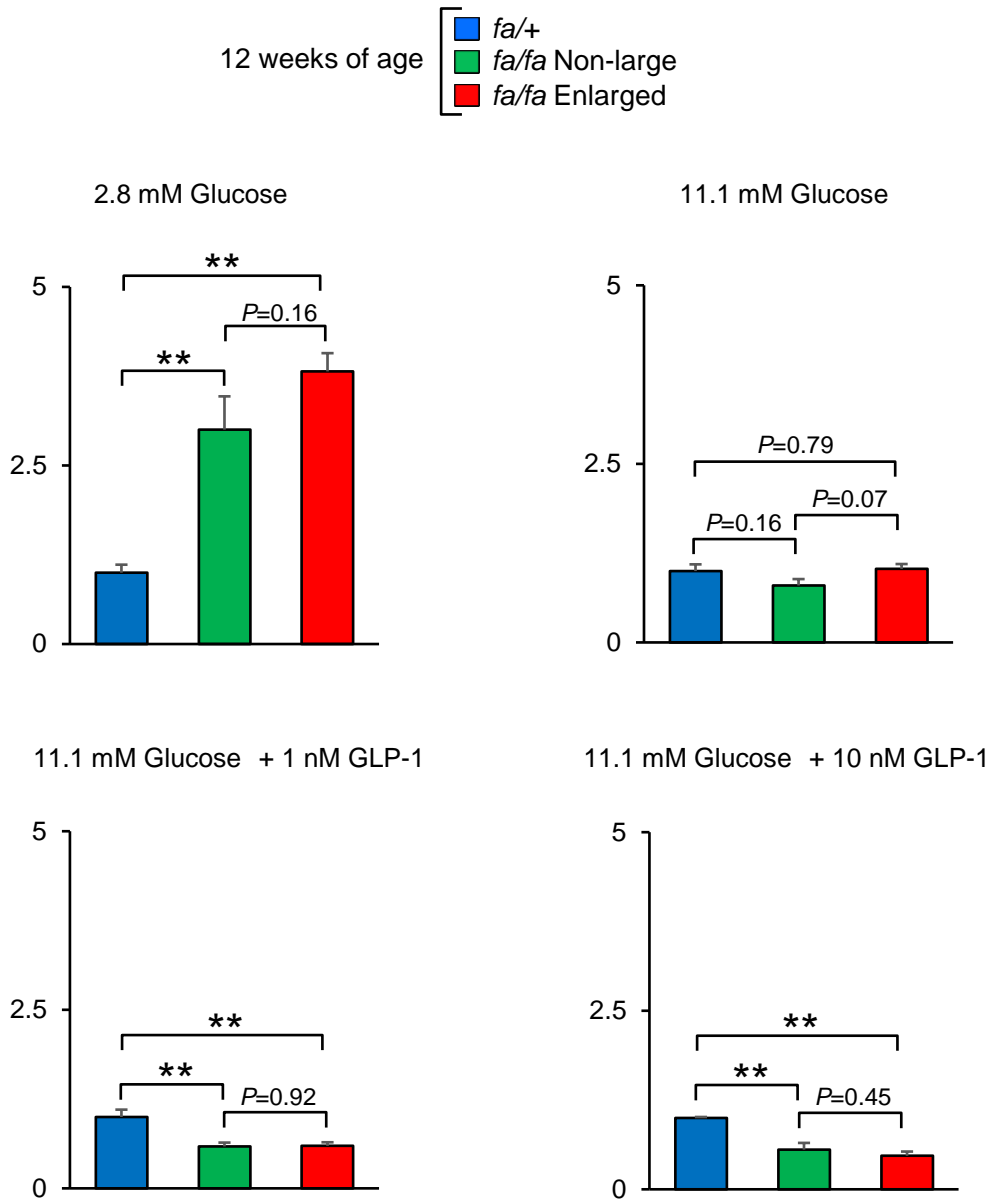

**Supplementary Figure 4: Comparison of insulin secretion among islets of *fa/+* and *fa/fa* rats at 12 weeks of age**

Insulin secretion is presented as fold-change relative to that of *fa/+* rats ( $n = 5-8$ ). The data are expressed as means  $\pm$  SEM. Holm's method was used for evaluation of statistical significance.  $**P < 0.01$ .

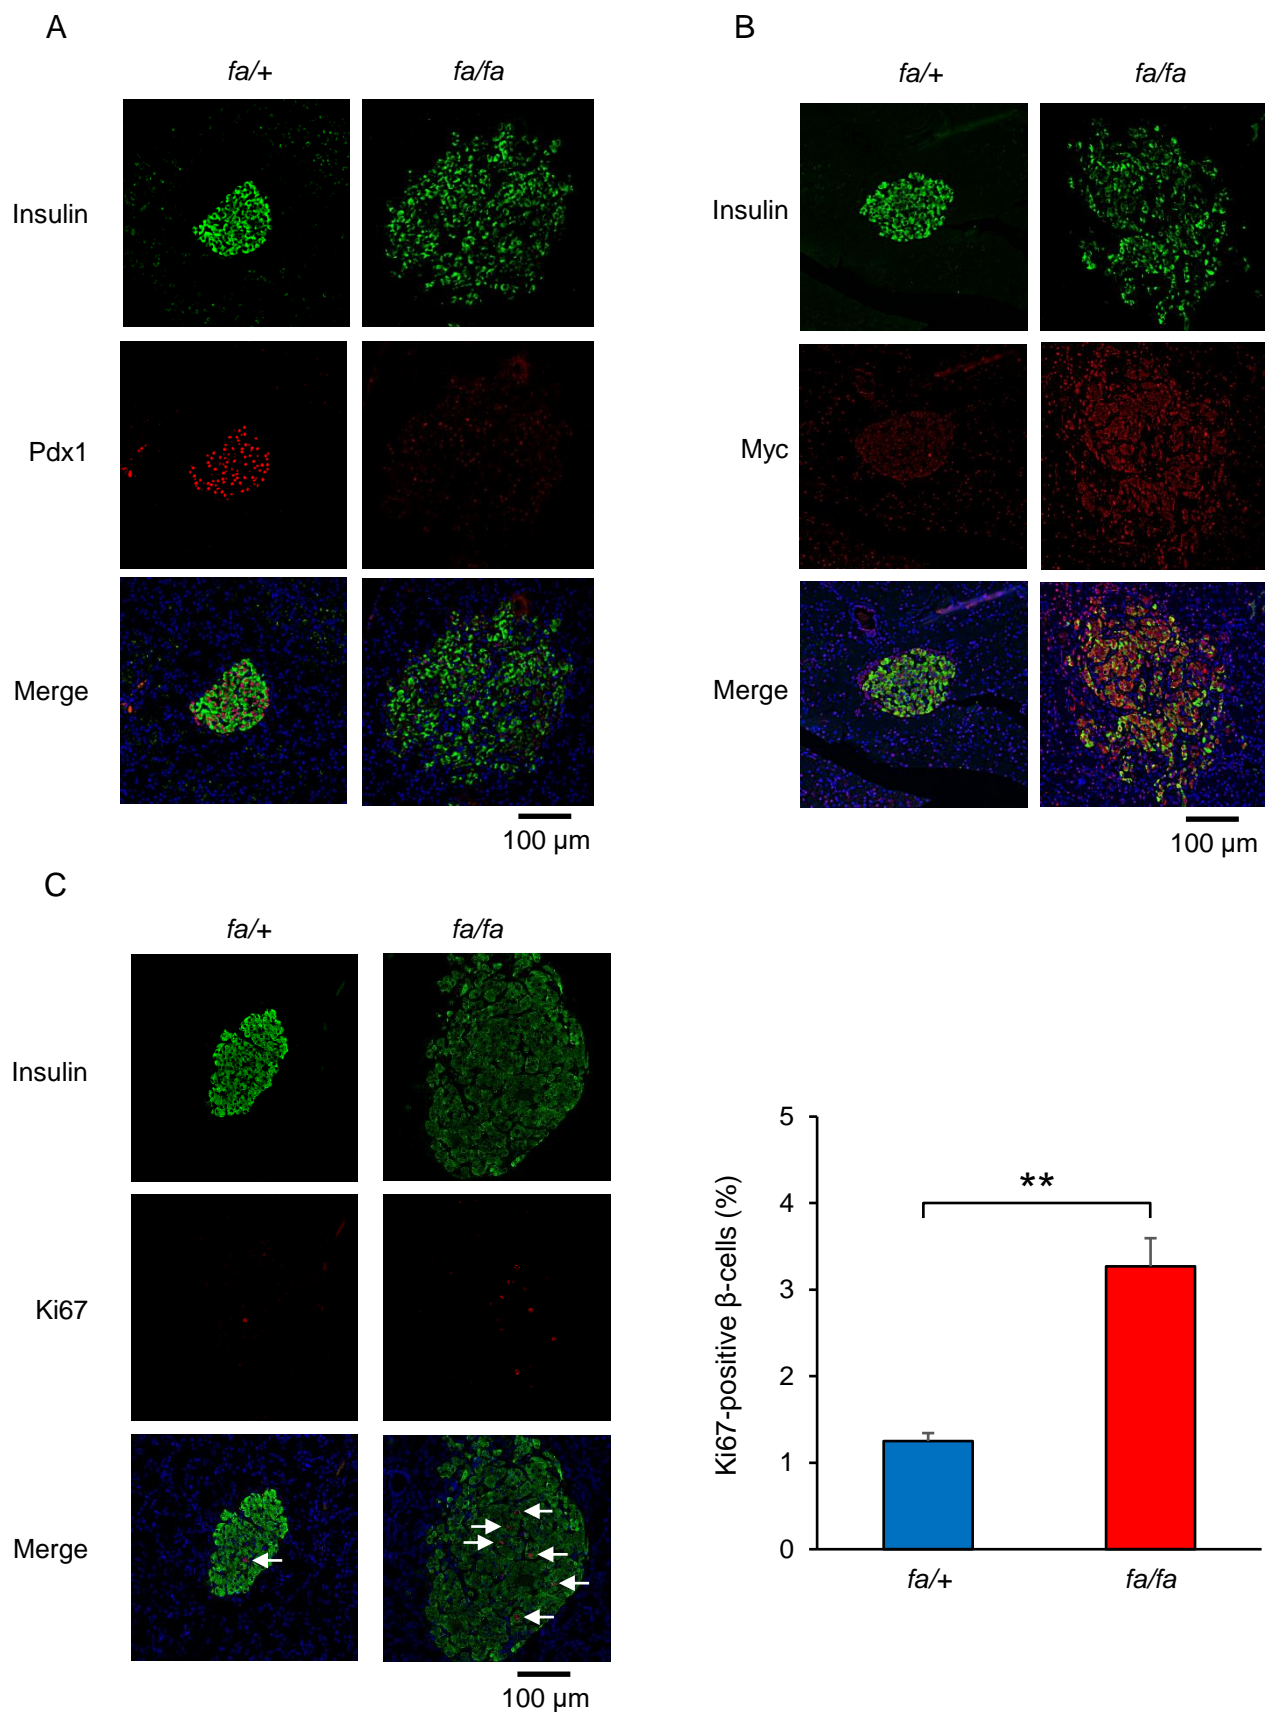

### Supplementary Figure 5: Immunostaining of pancreas

A: Immunostaining of ZFDM pancreas for insulin (green), Pdx1 (red), and DAPI (blue).

B: Immunostaining of ZFDM pancreas for insulin (green), Myc (red), and DAPI (blue).

C: Immunostaining of ZFDM pancreas for insulin (green), Ki67 (red), and DAPI (blue). White arrows indicate Ki67 and insulin double-positive cells. The data are expressed as means  $\pm$  SEM (n = 4). Welch's method was used for evaluation of statistical significance.

\*\* $P < 0.01$ .

A

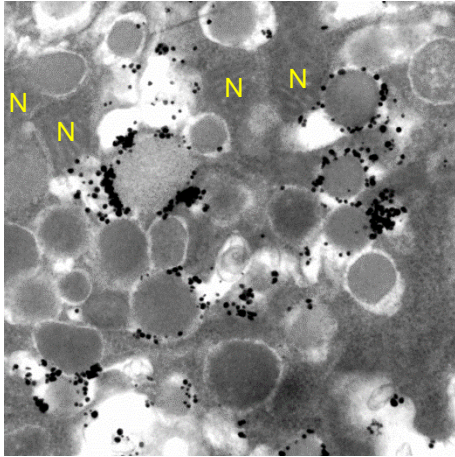0.5  $\mu\text{m}$ 

B

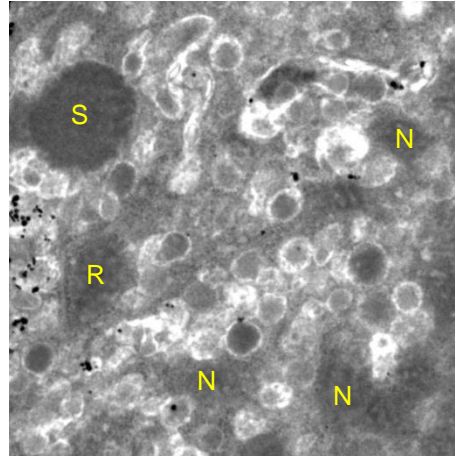0.5  $\mu\text{m}$ 

C

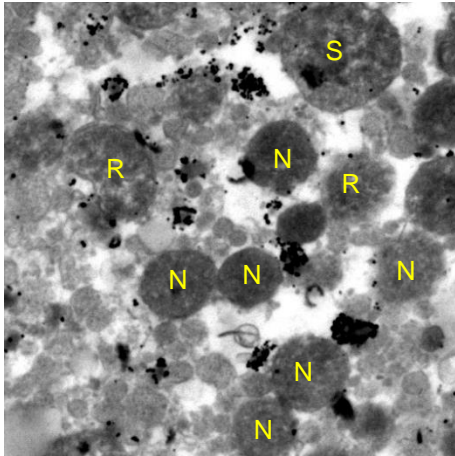0.5  $\mu\text{m}$ 

D

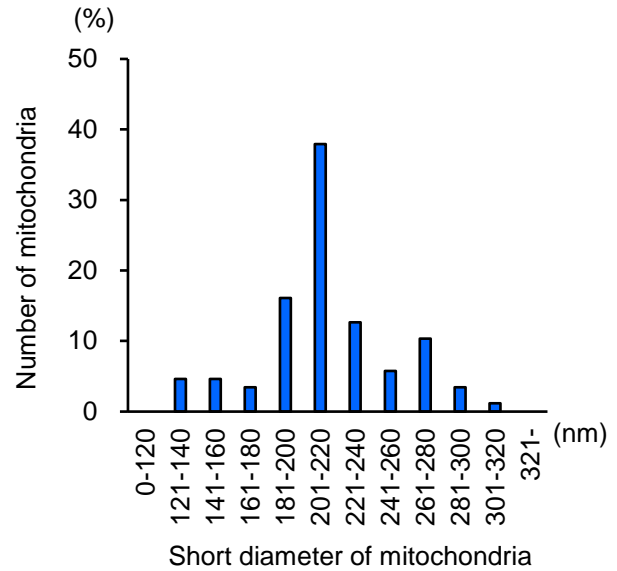

N: normal mitochondria  
 R: ruptured mitochondria  
 S: swollen mitochondria

### Supplementary Figure 6: Morphology of the mitochondria in $\beta$ -cells of ZFDM rats

Morphological examination of mitochondria was performed by transmission electron microscopy.

A: *fa/+*, B: *fa/fa* Non-large islets, C: *fa/fa* Enlarged islets, D: Size distribution of the mitochondria in  $\beta$ -cells of *fa/+* rats.

The black dots represent gold particles conjugated with a secondary antibody used for detection of the primary anti-insulin antibody.

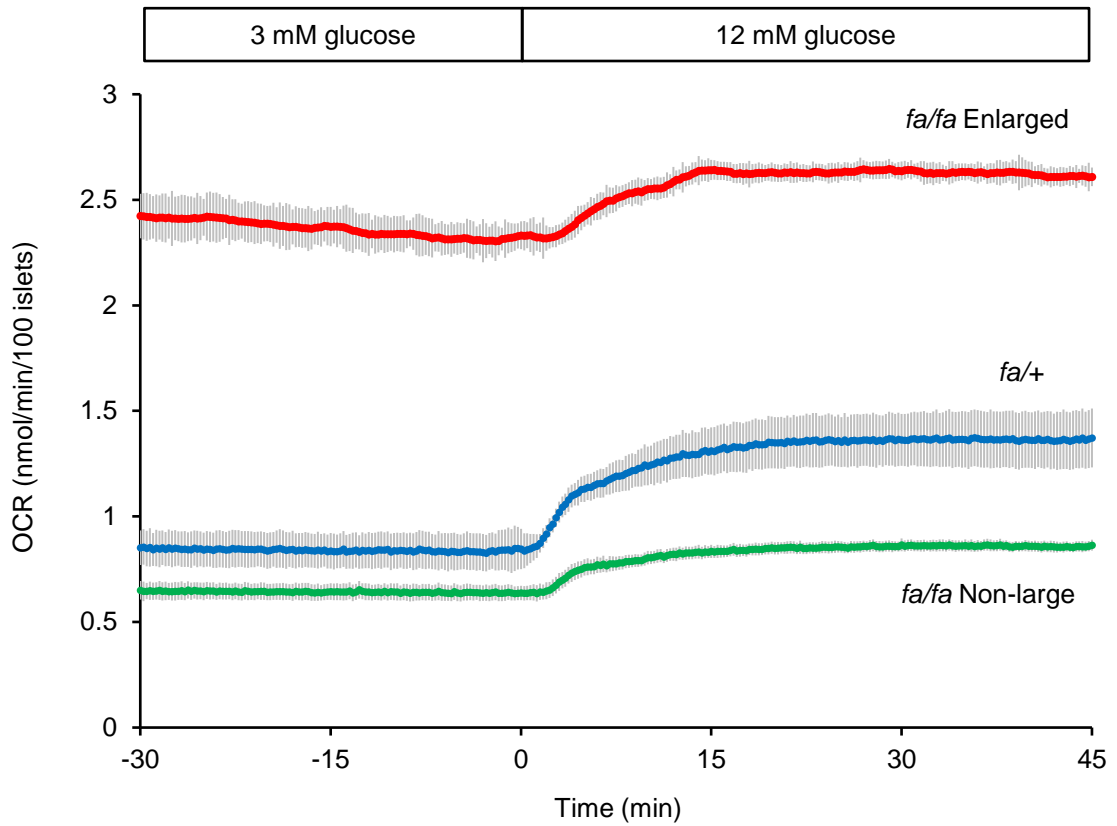

**Supplementary Figure 7: Oxygen consumption rate (OCR) of ZFDM islets**

The values of OCR were measured under low glucose (3 mM) and high glucose (12 mM) conditions (n = 3-4). The data are expressed as means  $\pm$  SEM.
